# Supplementary material for: Genome-wide identification of sucrose nonfermenting-1-related protein kinase (SnRK) genes in barley and RNA-seq analyses of their expression in response to abscisic acid treatment
Source: BMC Genomics. 2021 Apr 26;22:300. doi: 10.1186/s12864-021-07601-6 (PMC8074225; doi:10.1186/s12864-021-07601-6)
Supplement: Supplementary file 3 — Additional file 3. Synteny analysis between Arabidopsis/rice and barley. [file 12864_2021_7601_MOESM3_ESM.xlsx]

## Sheet: Synteny analysis 1
Homologous gene pairs			Homologous gene pairs
SnRKs in barley	SnRKs in Arabidopsis		SnRKs in Arabidopsis	SnRKs in barley
HvSnRK1.1	AtSnRK1.1		AtSnRK1.1	HvSnRK1.1
	AtSnRK1.2			HvSnRK1.2
HvSnRK1.2	AtSnRK1.1			HvSnRK1.6
	AtSnRK1.2		AtSnRK1.2	HvSnRK1.1
HvSnRK1.6	AtSnRK1.1			HvSnRK1.2
	AtSnRK1.2			HvSnRK1.6
HvSnRK2.1	AtSnRK2.8		AtSnRK2.1	HvSnRK2.3
	AtSnRK2.7			HvSnRK2.5
HvSnRK2.2	AtSnRK2.8		AtSnRK2.2	HvSnRK2.7
	AtSnRK2.7			HvSnRK2.8
HvSnRK2.3	AtSnRK2.5			HvSnRK2.9
	AtSnRK2.1			HvSnRK2.10
	AtSnRK2.10		AtSnRK2.3	HvSnRK2.7
	AtSnRK2.4			HvSnRK2.8
	AtSnRK2.9			HvSnRK2.9
HvSnRK2.5	AtSnRK2.10			HvSnRK2.10
	AtSnRK2.5		AtSnRK2.4	HvSnRK2.3
	AtSnRK2.1			HvSnRK2.5
	AtSnRK2.4			HvSnRK2.6
	AtSnRK2.9		AtSnRK2.5	HvSnRK2.3
HvSnRK2.6	AtSnRK2.10			HvSnRK2.5
	AtSnRK2.4			HvSnRK2.6
	AtSnRK2.5		AtSnRK2.6	HvSnRK2.7
	AtSnRK2.9			HvSnRK2.8
HvSnRK2.7	AtSnRK2.6			HvSnRK2.9
	AtSnRK2.3			HvSnRK2.10
	AtSnRK2.2		AtSnRK2.7	HvSnRK2.1
HvSnRK2.8	AtSnRK2.6			HvSnRK2.2
	AtSnRK2.3		AtSnRK2.8	HvSnRK2.1
	AtSnRK2.2			HvSnRK2.2
HvSnRK2.9	AtSnRK2.6		AtSnRK2.9	HvSnRK2.3
	AtSnRK2.3			HvSnRK2.5
	AtSnRK2.2			HvSnRK2.6
HvSnRK2.10	AtSnRK2.6		AtSnRK2.10	HvSnRK2.3
	AtSnRK2.3			HvSnRK2.5
	AtSnRK2.2			HvSnRK2.6
HvSnRK3.1	AtSnRK3.16		AtSnRK3.1	HvSnRK3.24
	AtSnRK3.21			HvSnRK3.25
HvSnRK3.2	AtSnRK3.16			HvSnRK3.6
	AtSnRK3.21		AtSnRK3.2	HvSnRK3.3
HvSnRK3.3	AtSnRK3.8			HvSnRK3.6
	AtSnRK3.2			HvSnRK3.17
HvSnRK3.4	AtSnRK3.9			HvSnRK3.19
	AtSnRK3.5			HvSnRK3.24
	AtSnRK3.20			HvSnRK3.25
HvSnRK3.5	AtSnRK3.26			HvSnRK3.34
HvSnRK3.6	AtSnRK3.8		AtSnRK3.3	HvSnRK3.23
	AtSnRK3.2			HvSnRK3.28
	AtSnRK3.6		AtSnRK3.4	HvSnRK3.30
	AtSnRK3.1		AtSnRK3.5	HvSnRK3.4
HvSnRK3.8	AtSnRK3.16			HvSnRK3.15
	AtSnRK3.21			HvSnRK3.31
HvSnRK3.11	AtSnRK3.23		AtSnRK3.6	HvSnRK3.6
HvSnRK3.14	AtSnRK3.6			HvSnRK3.14
	AtSnRK3.8		AtSnRK3.8	HvSnRK3.3
	AtSnRK3.14			HvSnRK3.6
HvSnRK3.15	AtSnRK3.9			HvSnRK3.14
	AtSnRK3.5			HvSnRK3.17
	AtSnRK3.20			HvSnRK3.19
HvSnRK3.17	AtSnRK3.8			HvSnRK3.24
	AtSnRK3.2			HvSnRK3.25
HvSnRK3.18	AtSnRK3.14			HvSnRK3.34
HvSnRK3.19	AtSnRK3.8		AtSnRK3.9	HvSnRK3.4
	AtSnRK3.2			HvSnRK3.15
HvSnRK3.20	AtSnRK3.17			HvSnRK3.31
	AtSnRK3.26		AtSnRK3.10	HvSnRK3.23
HvSnRK3.21	AtSnRK3.26			HvSnRK3.28
	AtSnRK3.17		AtSnRK3.11	HvSnRK3.33
HvSnRK3.22	AtSnRK3.12		AtSnRK3.12	HvSnRK3.22
HvSnRK3.23	AtSnRK3.3		AtSnRK3.13	HvSnRK3.33
	AtSnRK3.10		AtSnRK3.14	HvSnRK3.14
HvSnRK3.24	AtSnRK3.8			HvSnRK3.18
	AtSnRK3.2			HvSnRK3.26
	AtSnRK3.1		AtSnRK3.16	HvSnRK3.1
HvSnRK3.25	AtSnRK3.8			HvSnRK3.2
	AtSnRK3.2			HvSnRK3.8
	AtSnRK3.1		AtSnRK3.17	HvSnRK3.20
HvSnRK3.26	AtSnRK3.14			HvSnRK3.21
HvSnRK3.27	AtSnRK3.24		AtSnRK3.20	HvSnRK3.4
	AtSnRK3.25			HvSnRK3.15
HvSnRK3.28	AtSnRK3.3			HvSnRK3.31
	AtSnRK3.10		AtSnRK3.21	HvSnRK3.1
HvSnRK3.30	AtSnRK3.4			HvSnRK3.2
HvSnRK3.31	AtSnRK3.9			HvSnRK3.8
	AtSnRK3.5		AtSnRK3.23	HvSnRK3.11
	AtSnRK3.20		AtSnRK3.24	HvSnRK3.27
HvSnRK3.33	AtSnRK3.11		AtSnRK3.25	HvSnRK3.27
	AtSnRK3.13		AtSnRK3.26	HvSnRK3.5
HvSnRK3.34	AtSnRK3.8			HvSnRK3.20
	AtSnRK3.2			HvSnRK3.21

## Sheet: Synteny analysis 2
Homologous gene pairs			Homologous gene pairs
SnRKs in barley	SnRKs in rice		SnRKs in rice	SnRKs in barley
HvSnRK1.1	OsSnRK1.2		OsSnRK1.1	HvSnRK1.6
HvSnRK1.2	OsSnRK1.2		OsSnRK1.2	HvSnRK1.1
HvSnRK1.6	OsSnRK1.4			HvSnRK1.2
	OsSnRK1.1		OsSnRK2.1	HvSnRK2.2
HvSnRK2.1	OsSnRK2.3			HvSnRK2.4
HvSnRK2.2	OsSnRK2.2		OsSnRK2.2	HvSnRK2.2
	OsSnRK2.1		OsSnRK2.3	HvSnRK2.1
HvSnRK2.3	OsSnRK2.7		OsSnRK2.4	HvSnRK2.6
	OsSnRK2.6		OsSnRK2.5	HvSnRK2.5
HvSnRK2.4	OsSnRK2.1		OsSnRK2.6	HvSnRK2.3
HvSnRK2.5	OsSnRK2.5		OsSnRK2.7	HvSnRK2.3
HvSnRK2.6	OsSnRK2.4		OsSnRK2.8	HvSnRK2.9
HvSnRK2.7	OsSnRK2.10		OsSnRK2.9	HvSnRK2.8
HvSnRK2.8	OsSnRK2.9			HvSnRK2.10
HvSnRK2.9	OsSnRK2.8		OsSnRK2.10	HvSnRK2.7
HvSnRK2.10	OsSnRK2.9		OsSnRK3.1	HvSnRK3.13
HvSnRK3.1	OsSnRK3.14		OsSnRK3.2	HvSnRK3.14
	OsSnRK3.3		OsSnRK3.3	HvSnRK3.1
HvSnRK3.2	OsSnRK3.14			HvSnRK3.2
	OsSnRK3.3		OsSnRK3.5	HvSnRK3.16
HvSnRK3.3	OsSnRK3.18		OsSnRK3.6	HvSnRK3.15
HvSnRK3.4	OsSnRK3.20		OsSnRK3.7	HvSnRK3.17
HvSnRK3.5	OsSnRK3.11		OsSnRK3.8	HvSnRK3.34
	OsSnRK3.27		OsSnRK3.9	HvSnRK3.30
HvSnRK3.6	OsSnRK3.26		OsSnRK3.10	HvSnRK3.22
HvSnRK3.7	OsSnRK3.25		OsSnRK3.11	HvSnRK3.5
HvSnRK3.8	OsSnRK3.24			HvSnRK3.21
HvSnRK3.11	OsSnRK3.23		OsSnRK3.13	HvSnRK3.28
HvSnRK3.12	OsSnRK3.17		OsSnRK3.14	HvSnRK3.1
HvSnRK3.13	OsSnRK3.1			HvSnRK3.2
HvSnRK3.14	OsSnRK3.2		OsSnRK3.17	HvSnRK3.12
HvSnRK3.15	OsSnRK3.20		OsSnRK3.18	HvSnRK3.3
	OsSnRK3.6		OsSnRK3.20	HvSnRK3.4
HvSnRK3.16	OsSnRK3.5			HvSnRK3.15
HvSnRK3.17	OsSnRK3.7		OsSnRK3.21	HvSnRK3.32
HvSnRK3.18	OsSnRK3.28		OsSnRK3.22	HvSnRK3.33
HvSnRK3.19	OsSnRK3.33		OsSnRK3.23	HvSnRK3.11
	OsSnRK3.31		OsSnRK3.24	HvSnRK3.8
HvSnRK3.20	OsSnRK3.34		OsSnRK3.25	HvSnRK3.7
	OsSnRK3.32		OsSnRK3.26	HvSnRK3.6
HvSnRK3.21	OsSnRK3.11		OsSnRK3.27	HvSnRK3.5
HvSnRK3.22	OsSnRK3.10		OsSnRK3.28	HvSnRK3.18
HvSnRK3.24	OsSnRK3.33		OsSnRK3.29	HvSnRK3.27
	OsSnRK3.31		OsSnRK3.30	HvSnRK3.26
HvSnRK3.25	OsSnRK3.33		OsSnRK3.31	HvSnRK3.19
	OsSnRK3.31			HvSnRK3.24
HvSnRK3.26	OsSnRK3.30			HvSnRK3.25
HvSnRK3.27	OsSnRK3.29		OsSnRK3.32	HvSnRK3.20
HvSnRK3.28	OsSnRK3.13		OsSnRK3.33	HvSnRK3.19
HvSnRK3.30	OsSnRK3.9			HvSnRK3.24
HvSnRK3.32	OsSnRK3.21			HvSnRK3.25
HvSnRK3.33	OsSnRK3.22		OsSnRK3.34	HvSnRK3.20
HvSnRK3.34	OsSnRK3.8
